# Supplementary material for: Design and synthesis of three new copper coordination polymers: efficient degradation of an organic dye at alkaline pH
Source: Royal Society of Chemistry journal article supplement (doi:10.1039/d1dt02463a), 2021-01-01
Supplement: d1dt02463a1.pdf [file d1dt02463a1.pdf]

## Electronic Supporting Information

### Design and synthesis of three new copper coordination polymers: efficient degradation of organic dye at alkaline pH

Xiaxia Liu, Liping Lu, Miaoli Zhu, Ulli Englert

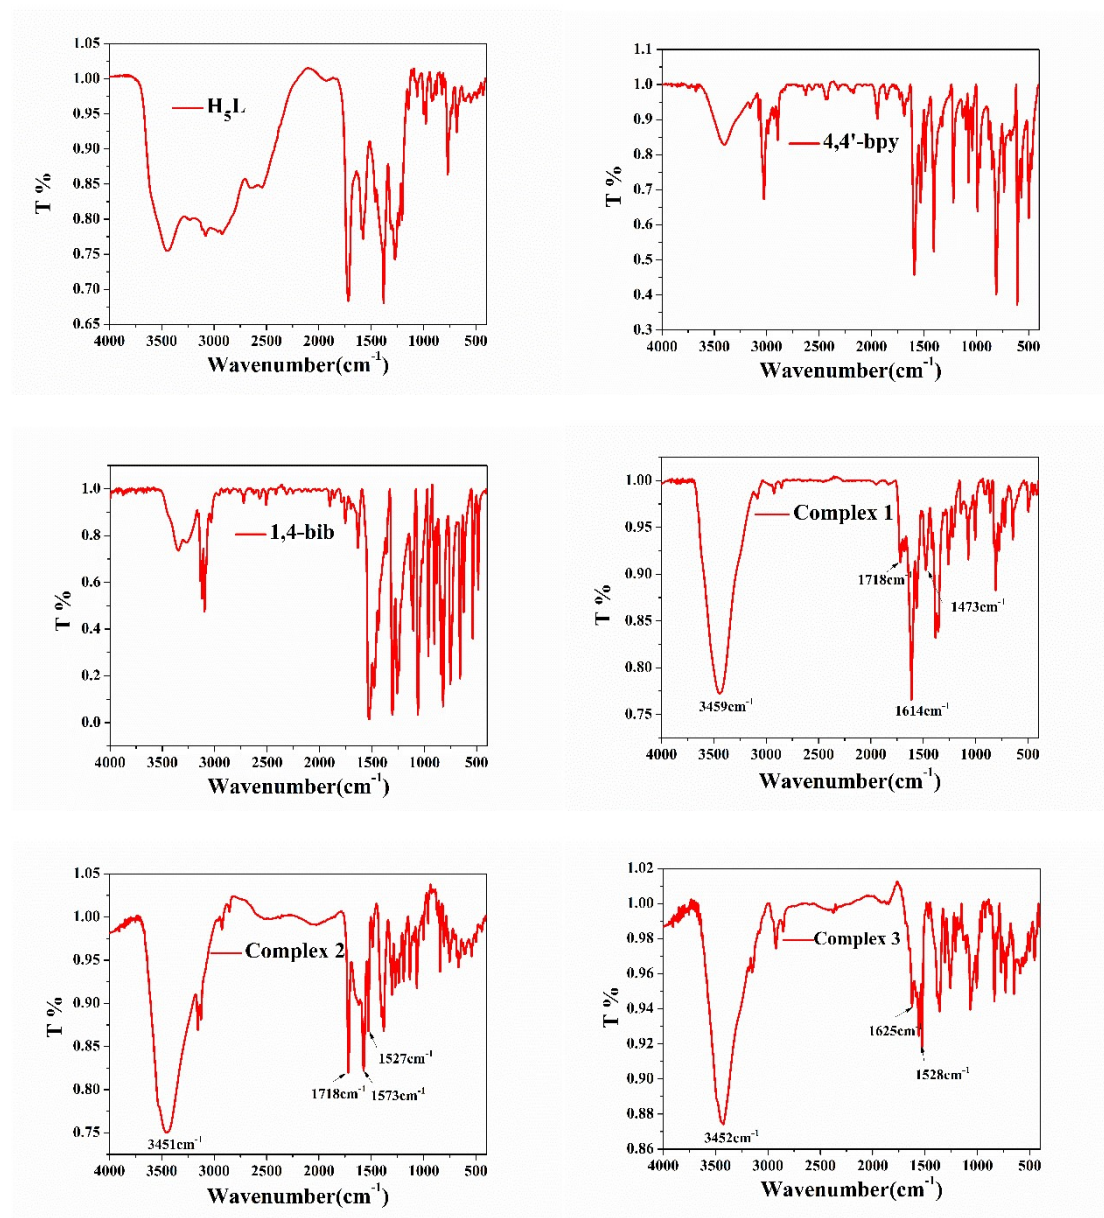

Fig. S1 IR spectra of ligand and compounds 1–3 (KBr, cm<sup>-1</sup>).

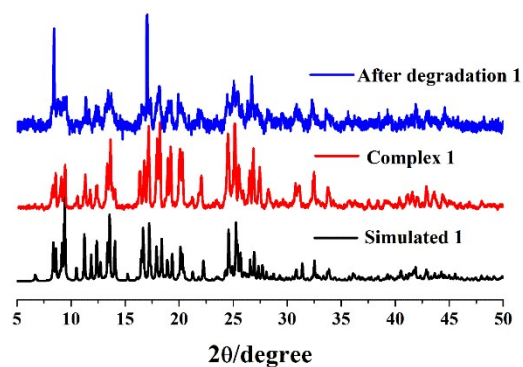

**Fig. S2** PXRD patterns (simulation based on the single crystal structure, experimental, experimental after degradation) for complex 1 in the  $2\theta$  range of 5 to  $50^\circ$ .

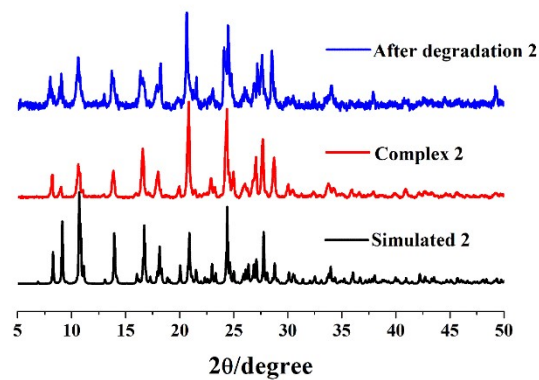

**Fig. S3** PXRD patterns (simulation based on the single crystal structure, experimental, experimental after degradation) for complex 2 in the  $2\theta$  range of 5 to  $50^\circ$ .

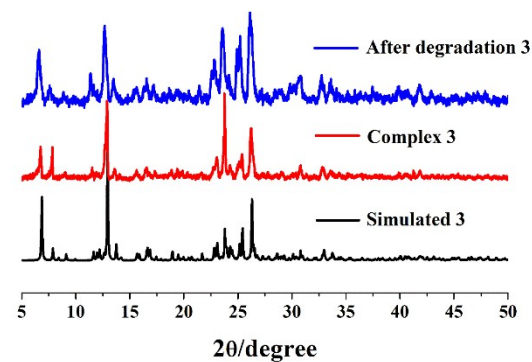

**Fig. S4** PXRD patterns (simulation based on the single crystal structure, experimental, experimental after degradation) for complex 3 in the  $2\theta$  range of 5 to  $50^\circ$ .

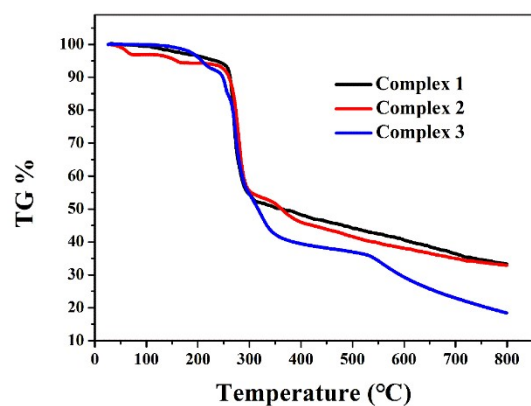

**Fig. S5** TGA curves for compounds 1-3 collected under  $N_2$  atmosphere.

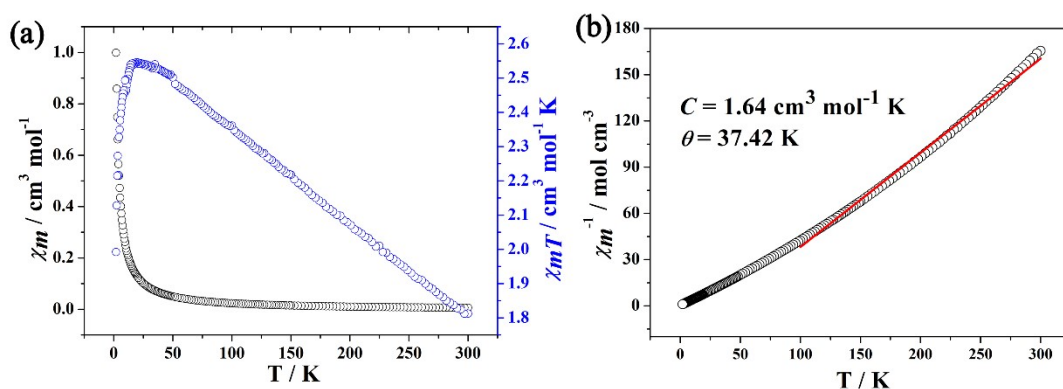

**Fig.S6** (a)  $\chi_M$  and  $\chi_M T$  vs T plots for complex 1; (b)  $\chi_M^{-1}$  vs T plot for 1. The solid line represents the best fits.

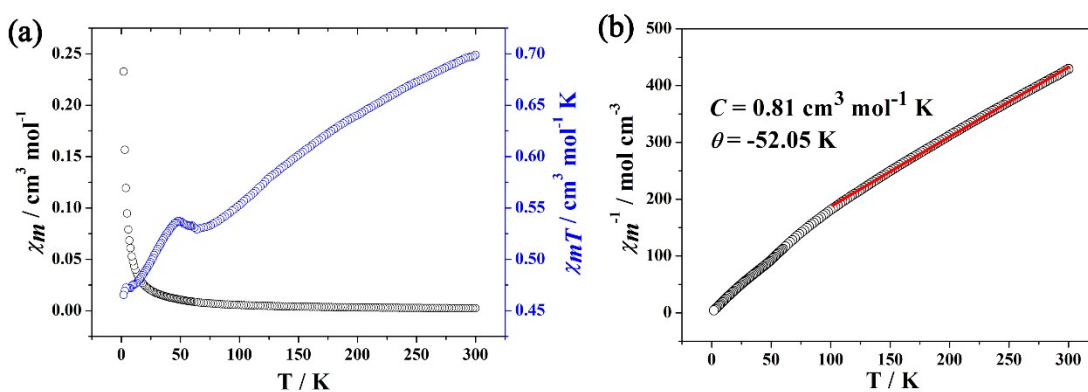

**Fig.S7** (a)  $\chi_M$  and  $\chi_M T$  vs T plots for complex 2; (b)  $\chi_M^{-1}$  vs T plot for 2. The solid line represents the best fits.

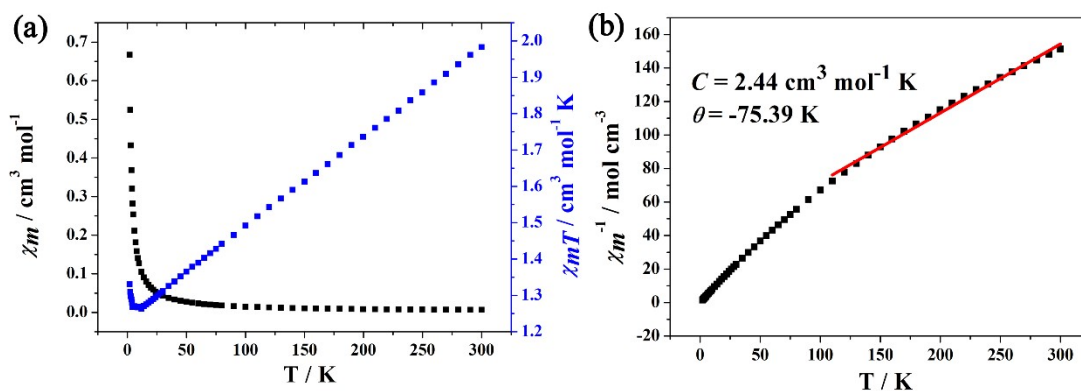

**Fig.S8** (a)  $\chi_M$  and  $\chi_M T$  vs T plots for complex **3**; (b)  $\chi_M^{-1}$  vs T plot for **3**. The solid line represents the best fits.

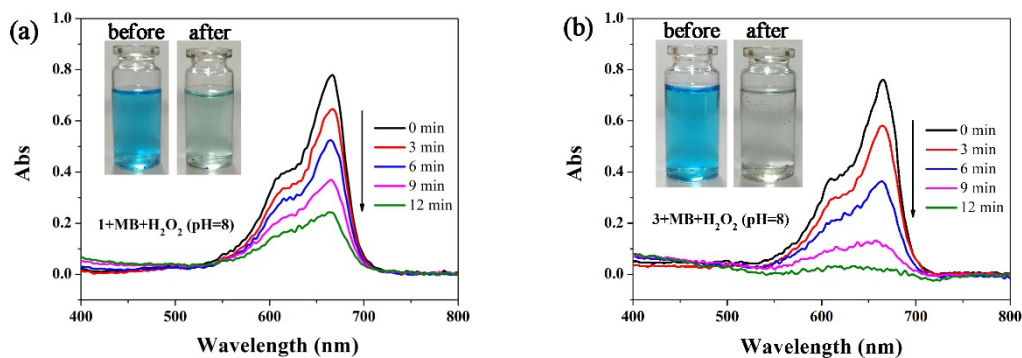

**Fig. S9** UV-vis absorption spectra of MB (a) complex **1** (b) complex **3** ([MB] = 10 mg/L, [H<sub>2</sub>O<sub>2</sub>] = 50 mM, complex = 5 mg, T = 25 °C, pH = 8). The illustrations are photographs before and after MB degradation.

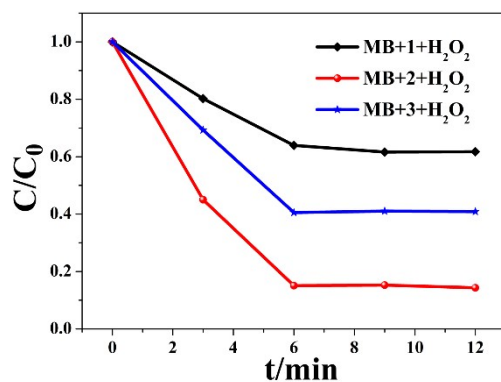

**Fig. S10** Concentration of MB as a function of reaction time; catalysts were removed after 6 minutes. ([MB] = 10 mg/L, [H<sub>2</sub>O<sub>2</sub>] = 50 mM, complex = 5 mg, T = 25 °C, pH = 8).

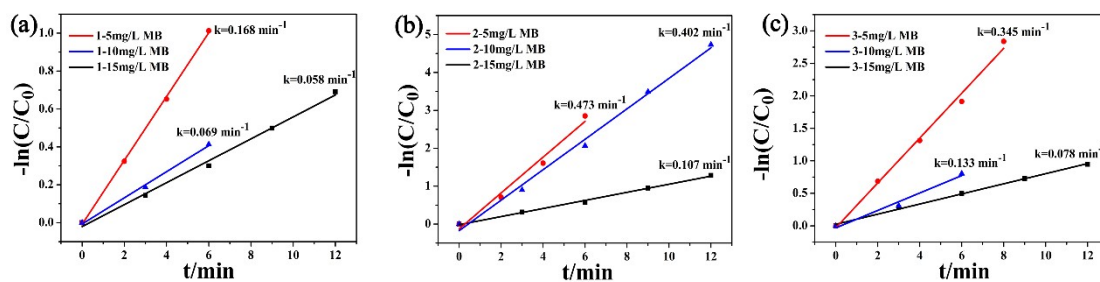

**Fig. S11** Plot of  $-\ln(C/C_0)$  vs. time for the pseudo-first-order kinetics curves of the photocatalytic degradation under different initial MB concentrations: (a) complex 1 (b) complex 2 (c) complex 3 ( $[H_2O_2] = 50$  mM, complex = 5 mg,  $T = 25$  °C,  $pH = 8$ ).

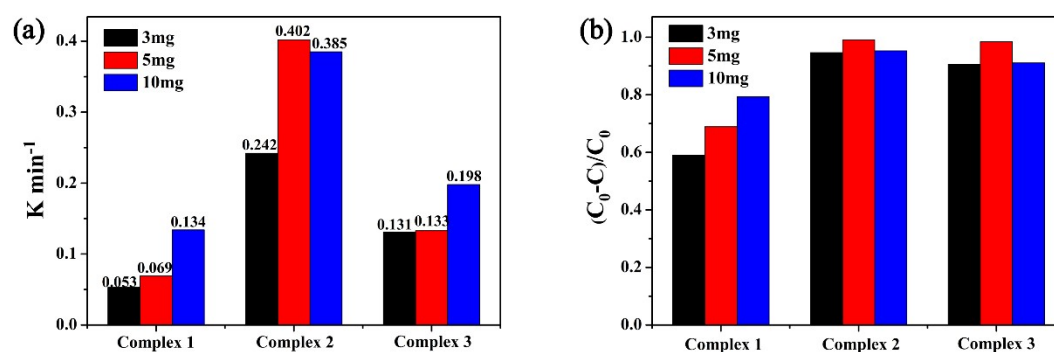

**Fig. S12** The photocatalytic degradation rate constants (a) and removal efficiency (b) of complexes 1-3 under different catalyst dosages. ( $[MB] = 10$  mg/L,  $[H_2O_2] = 50$  mM,  $T = 25$  °C,  $pH = 8$ ).

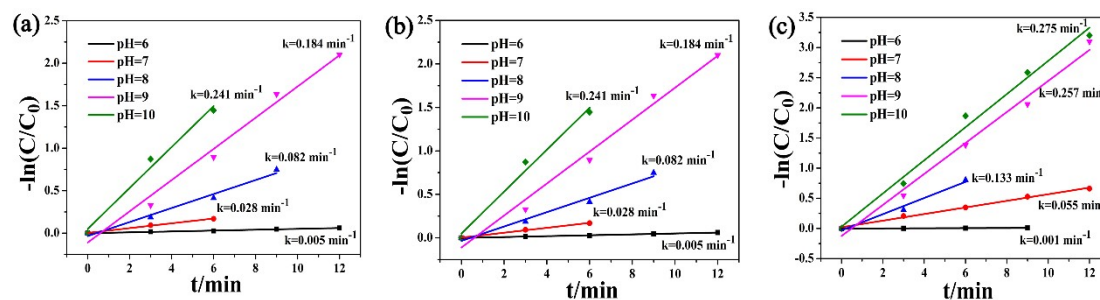

**Fig. S13** Plot of  $-\ln(C/C_0)$  vs. time for the pseudo-first-order kinetics curves of the photocatalytic degradation under different pH: (a) complex 1 (b) complex 2 (c) complex 3. ( $[MB] = 10$  mg/L,  $[H_2O_2] = 50$  mM, complex = 5 mg,  $T = 25$  °C).

**Table S1** Selected Bond Angles (°) and Bond Lengths (Å) in **1**.

| Bond distance (Å)     |           | Bond angle (°)            |             |                           |             |
|-----------------------|-----------|---------------------------|-------------|---------------------------|-------------|
| Cu1—O18 <sup>ii</sup> | 1.975 (3) | O18 <sup>ii</sup> —Cu1—O1 | 170.78 (15) | N6—Cu2—O19 <sup>iii</sup> | 89.84 (13)  |
| Cu1—O1                | 1.976 (3) | O18 <sup>ii</sup> —Cu1—N1 | 88.92 (14)  | O4—Cu3—O12                | 170.62 (14) |
| Cu1—O17 <sup>ii</sup> | 2.769 (3) | O1—Cu1—N1                 | 92.08 (14)  | O4—Cu3—N3                 | 91.76 (13)  |

|                        |           |                                          |             |                                          |             |
|------------------------|-----------|------------------------------------------|-------------|------------------------------------------|-------------|
| Cu1—N1                 | 2.016 (4) | O18 <sup>ii</sup> —Cu1—N2                | 91.36 (15)  | O12—Cu3—N3                               | 88.84 (13)  |
| Cu1—N2                 | 2.027 (4) | O1—Cu1—N2                                | 90.37 (14)  | O4—Cu3—N4 <sup>vi</sup>                  | 88.63 (13)  |
| Cu1—O23                | 2.249 (5) | N1—Cu1—N2                                | 162.92 (17) | O12—Cu3—N4 <sup>vi</sup>                 | 89.38 (14)  |
| Cu2—O20 <sup>v</sup>   | 1.974 (3) | O18 <sup>ii</sup> —Cu1—O23               | 83.31 (19)  | N3—Cu3—N4 <sup>vi</sup>                  | 171.34 (15) |
| Cu2—O11                | 1.974 (3) | O1—Cu1—O23                               | 87.47 (18)  | O4—Cu3—O3 <sup>iii</sup>                 | 102.95 (12) |
| Cu2—N5 <sup>iv</sup>   | 2.013 (3) | N1—Cu1—O23                               | 97.1 (2)    | O12—Cu3—O3 <sup>iii</sup>                | 86.26 (13)  |
| Cu2—N6                 | 2.015 (4) | N2—Cu1—O23                               | 99.9 (2)    | N3—Cu3—O3 <sup>iii</sup>                 | 97.01 (13)  |
| Cu2—O19 <sup>iii</sup> | 2.314 (3) | O20 <sup>v</sup> —Cu2—O11                | 167.03 (13) | N4 <sup>vi</sup> —Cu3—O3 <sup>iii</sup>  | 91.33 (13)  |
| Cu3—O4                 | 1.951 (3) | O20 <sup>v</sup> —Cu2—N5 <sup>iv</sup>   | 92.09 (13)  | O11—Cu2—N6                               | 90.07 (13)  |
| Cu3—O12                | 1.967 (3) | O11—Cu2—N5 <sup>iv</sup>                 | 88.36 (13)  | N5 <sup>iv</sup> —Cu2—N6                 | 174.13 (15) |
| Cu3—N3                 | 2.015 (4) | O20 <sup>v</sup> —Cu2—N6                 | 88.18 (13)  | O20 <sup>v</sup> —Cu2—O19 <sup>iii</sup> | 109.88 (12) |
| Cu3—N4 <sup>vi</sup>   | 2.020 (4) | O11—Cu2—N6                               | 90.07 (13)  | O11—Cu2—O19 <sup>iii</sup>               | 82.96 (12)  |
| Cu3—O3 <sup>iii</sup>  | 2.257 (3) | N5 <sup>iv</sup> —Cu2—N6                 | 174.13 (15) | N5 <sup>iv</sup> —Cu2—O19 <sup>iii</sup> | 95.57 (13)  |
|                        |           | O20 <sup>v</sup> —Cu2—O19 <sup>iii</sup> | 109.88 (12) | N6—Cu2—O19 <sup>iii</sup>                | 89.84 (13)  |
|                        |           | O11—Cu2—O19 <sup>iii</sup>               | 82.96 (12)  | O4—Cu3—O12                               | 170.62 (14) |
|                        |           | N5 <sup>iv</sup> —Cu2—O19 <sup>iii</sup> | 95.57 (13)  | O4—Cu3—N3                                | 91.76 (13)  |

Symmetry codes: (ii) -x, -y, -z; (iii) -x+1, -y, -z; (iv) x-1, y, z; (v) x, y-1, z+1; (vi) x+1, y, z

**Table S2** Selected Bond Angles (°) and Bond Lengths (Å) in **2**.

| Bond distance (Å)    |           | Bond angle (°)                        |             |                          |             |
|----------------------|-----------|---------------------------------------|-------------|--------------------------|-------------|
| Cu1—O8 <sup>i</sup>  | 1.943 (3) | O8 <sup>i</sup> —Cu1—N4 <sup>ii</sup> | 93.49 (12)  | N4 <sup>ii</sup> —Cu1—O1 | 93.05 (12)  |
| Cu1—N4 <sup>ii</sup> | 1.991 (3) | O8 <sup>i</sup> —Cu1—N1               | 97.45 (12)  | N4 <sup>ii</sup> —Cu1—N1 | 153.66 (12) |
| Cu1—N1               | 1.996 (3) | O8 <sup>i</sup> —Cu1—O1               | 148.49 (11) | N1—Cu1—O1                | 90.03 (12)  |
| Cu1—O1               | 2.066 (2) | O8 <sup>i</sup> —Cu1—O2               | 92.40 (11)  | N1—Cu1—O2                | 98.81 (12)  |
| Cu1—O2               | 2.551 (2) | N4 <sup>ii</sup> —Cu1—O2              | 104.60 (12) | O1—Cu1—O2                | 56.98 (11)  |

Symmetry codes: (i) x-1, y, z; (ii) x, y, z-1.

**Table S3** Selected Bond Angles (°) and Bond Lengths (Å) in **3**.

| Bond distance (Å)     |           | Bond angle (°)                        |             |                                         |            |
|-----------------------|-----------|---------------------------------------|-------------|-----------------------------------------|------------|
| Cu1—O5 <sup>i</sup>   | 1.965 (3) | O5 <sup>i</sup> —Cu1—O1               | 164.35 (15) | N1—Cu1—O6 <sup>iii</sup>                | 86.64 (15) |
| Cu1—O1                | 1.997 (3) | O5 <sup>i</sup> —Cu1—N1               | 87.53 (15)  | N4 <sup>ii</sup> —Cu1—O6 <sup>iii</sup> | 96.79 (15) |
| Cu1—N1                | 2.006 (4) | O1—Cu1—N1                             | 88.72 (15)  | O12 <sup>iv</sup> —Cu2—O12              | 180.0      |
| Cu1—N4 <sup>ii</sup>  | 2.012 (4) | O5 <sup>i</sup> —Cu1—N4 <sup>ii</sup> | 92.31 (15)  | O12 <sup>iv</sup> —Cu2—N5               | 90.9 (2)   |
| Cu1—O6 <sup>iii</sup> | 2.317 (4) | O1—Cu1—N4 <sup>ii</sup>               | 90.50 (15)  | O12—Cu2—N5                              | 89.1 (2)   |

|                       |           |                                        |             |                                         |          |
|-----------------------|-----------|----------------------------------------|-------------|-----------------------------------------|----------|
| Cu2—O12 <sup>iv</sup> | 1.933 (4) | N1—Cu1—N4 <sup>ii</sup>                | 176.45 (17) | O12 <sup>iv</sup> —Cu2—N5 <sup>iv</sup> | 89.1 (2) |
| Cu2—O12               | 1.933 (4) | O5 <sup>i</sup> —Cu1—O6 <sup>iii</sup> | 107.05 (14) | O12—Cu2—N5 <sup>iv</sup>                | 90.9 (2) |
| Cu2—N5                | 1.998 (5) | O1—Cu1—O6 <sup>iii</sup>               | 87.88 (14)  | N5—Cu2—N5 <sup>iv</sup>                 | 180.0    |
| Cu2—N5 <sup>iv</sup>  | 1.999 (5) |                                        |             |                                         |          |

Symmetry codes: (i)  $x-1, y, z$ ; (ii)  $x, y, z-1$ ; (iii)  $-x+2, -y+2, -z+1$ ; (iv)  $-x+2, -y+1, -z+1$ .

**Table S4** Results of leached copper in solution after degradation

| Catalyst  | Cu/mg·L <sup>-1</sup> |
|-----------|-----------------------|
| Complex 1 | 4.1                   |
| Complex 2 | 1.3                   |
| Complex 3 | 2.0                   |
